# Supplementary material
Source: PubMed Central journal article supplement (PMC4850306)
Supplement: 10.1074_M115.707612_jbc.M115.707612-1.pdf [file 10.1074_M115.707612_jbc.M115.707612-1.pdf]

**Supplementary Figure 1**

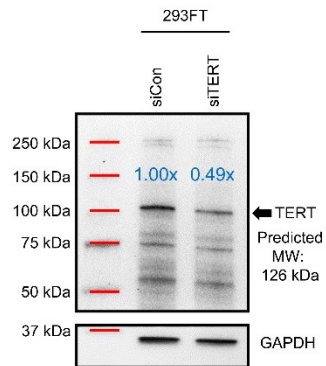

**Supplementary Figure 1.** Validation of TERT antibody specificity for immunoblot by transfection of TERT siRNA into 293FT cells for 48 h. GAPDH was used as a protein loading control.
