# Supplementary material
Source: PubMed Central journal article supplement (PMC4850306)
Supplement: 10.1074_M115.707612_jbc.M115.707612-2.pdf [file 10.1074_M115.707612_jbc.M115.707612-2.pdf]

## Supplementary Figure 2

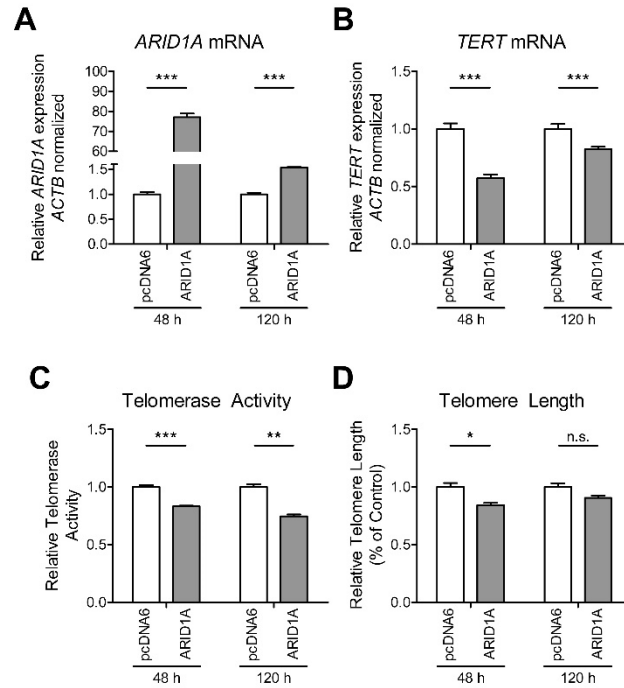

**Supplementary Figure 2.** (A) Transient ARID1A expression reverses the telomere phenotypes in hEM3 ARID1A KO CRISPR/Cas9 cells by (B) inhibiting *TERT* mRNA expression, (C) telomerase activity, and (D) shortened telomere length. Data were obtained from triplicate experiments and shown as mean  $\pm$  SEM. \*  $p < 0.05$ , \*\*  $p < 0.01$ , \*\*\*  $p < 0.001$ .
